# Supplementary material
Source: Springer Nature journal article supplement (https://www.springermedizin.de/resource/supplementary/12947_2007_177_MOESM1_ESM.pdf/9556394)

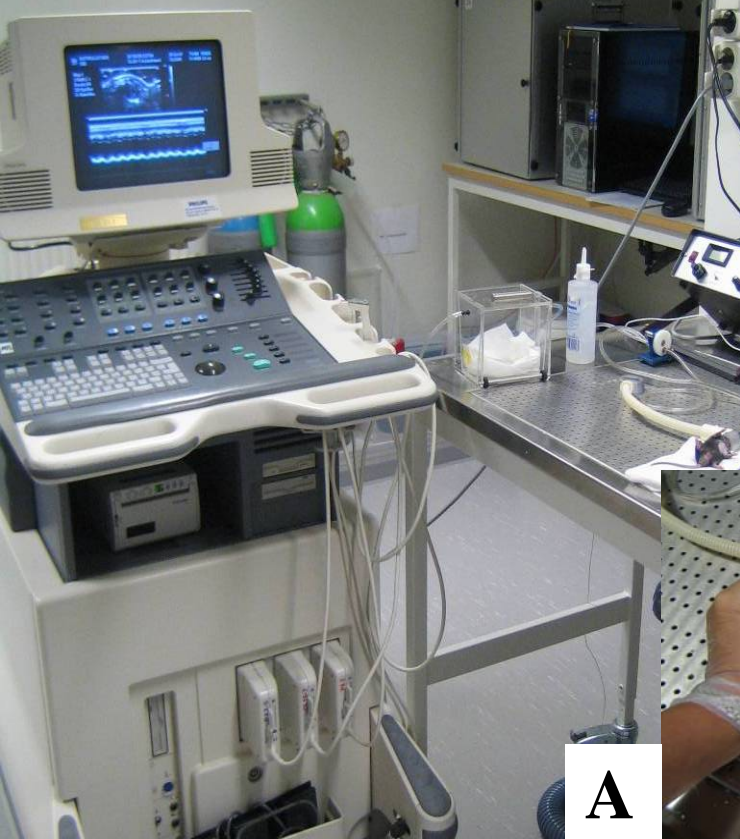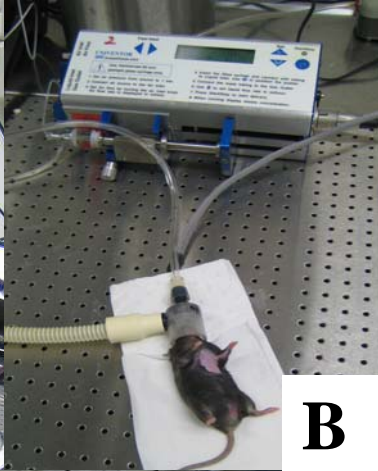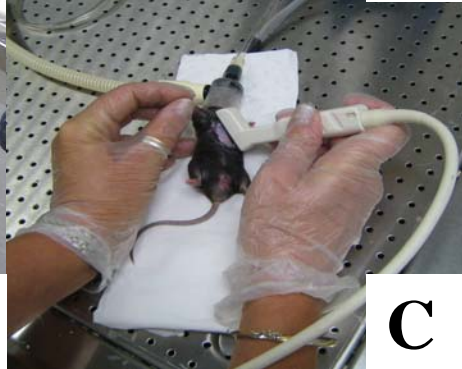**B****A****C**

Supplement: MOESM1 [file 9556394]
